# Supplementary material for: BPA Decreases PDCD4 in Bovine Granulosa Cells Independently of miR-21 Inhibition
Source: MDPI journal article supplement (doi:10.3390/ijms23158276), 2022-07-27
Supplement: s1 [file s1]

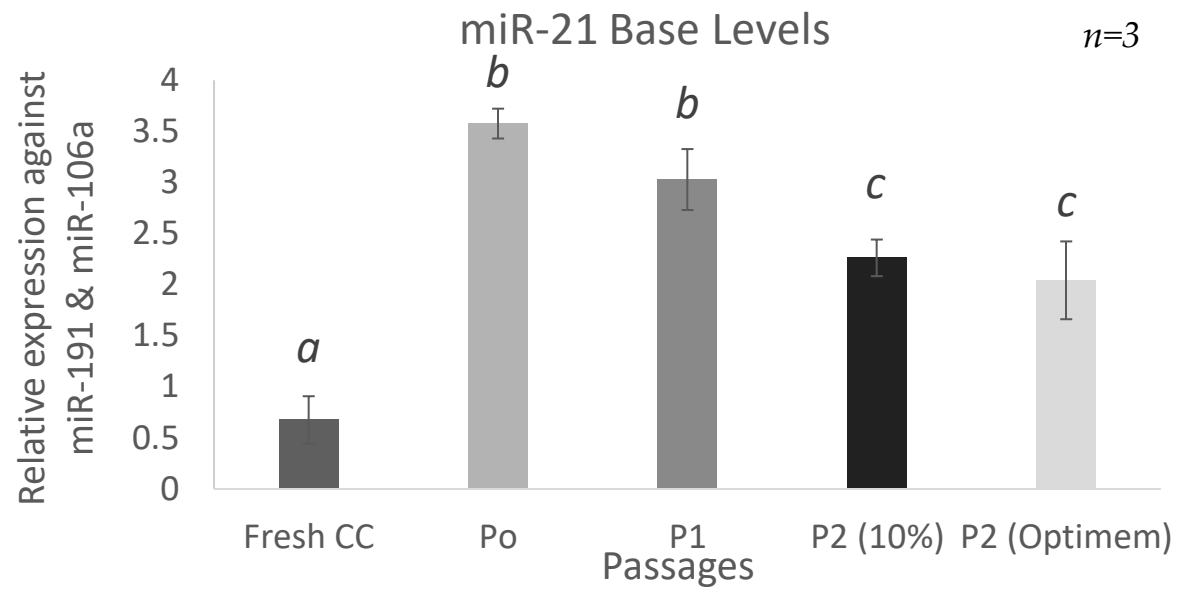

Supplementary Figure S1. mi-21 levels upon plating, throughout passaging, and after serum restriction.

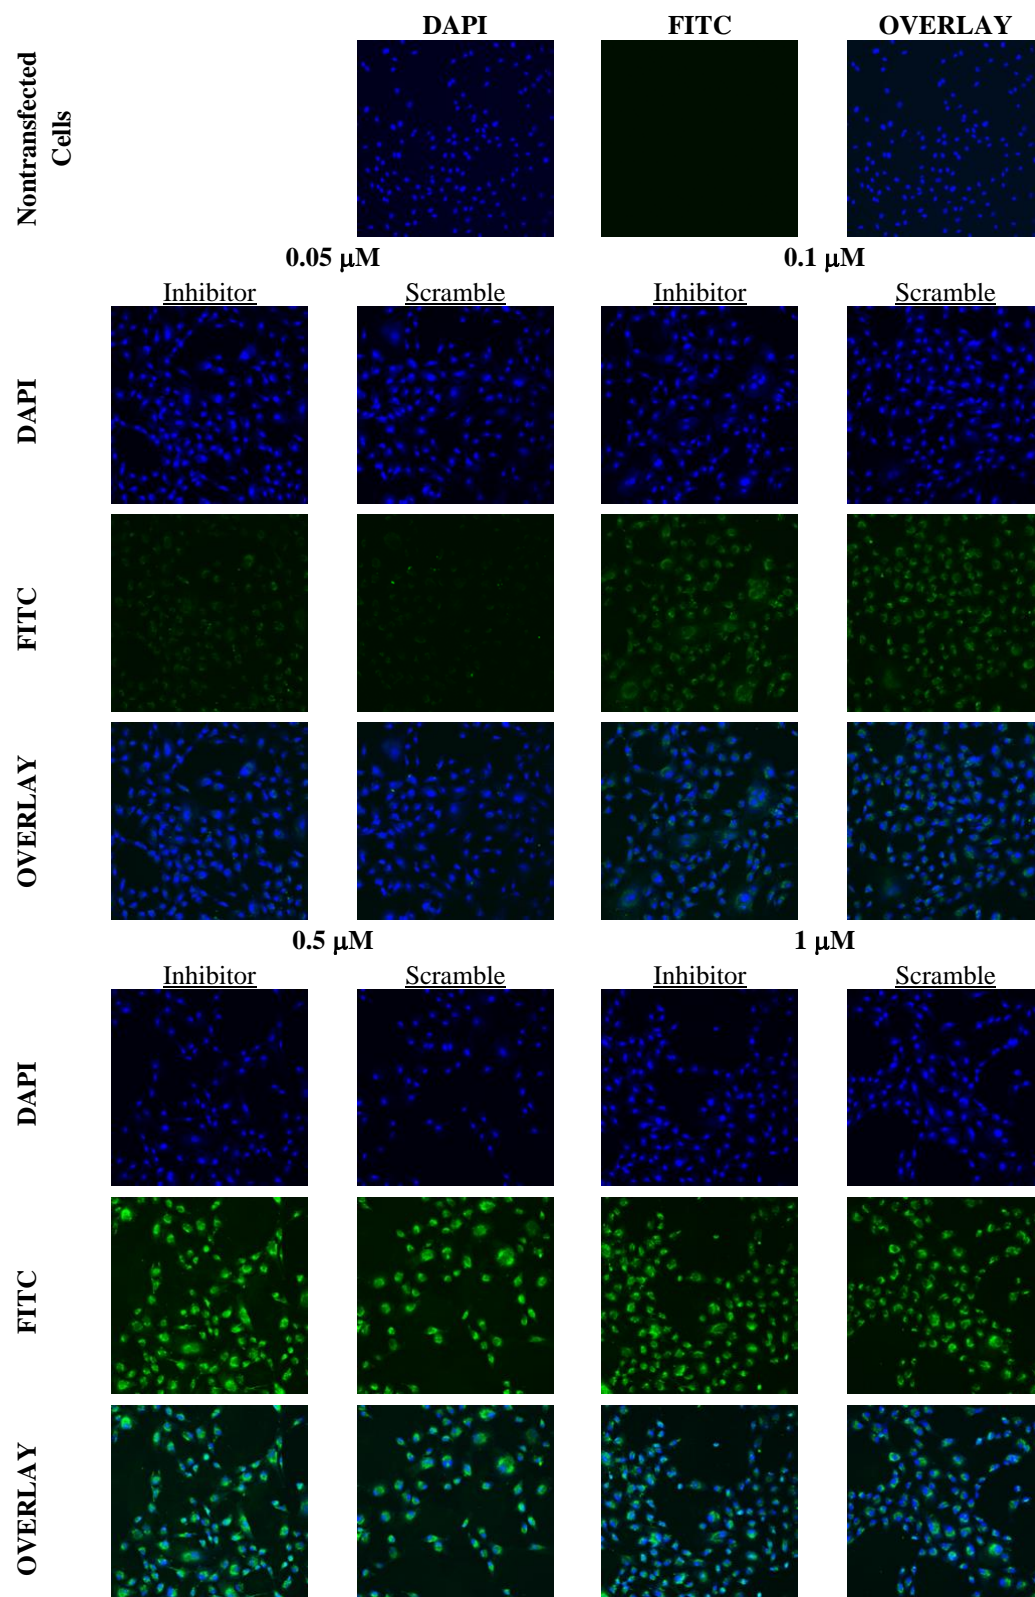

(A)

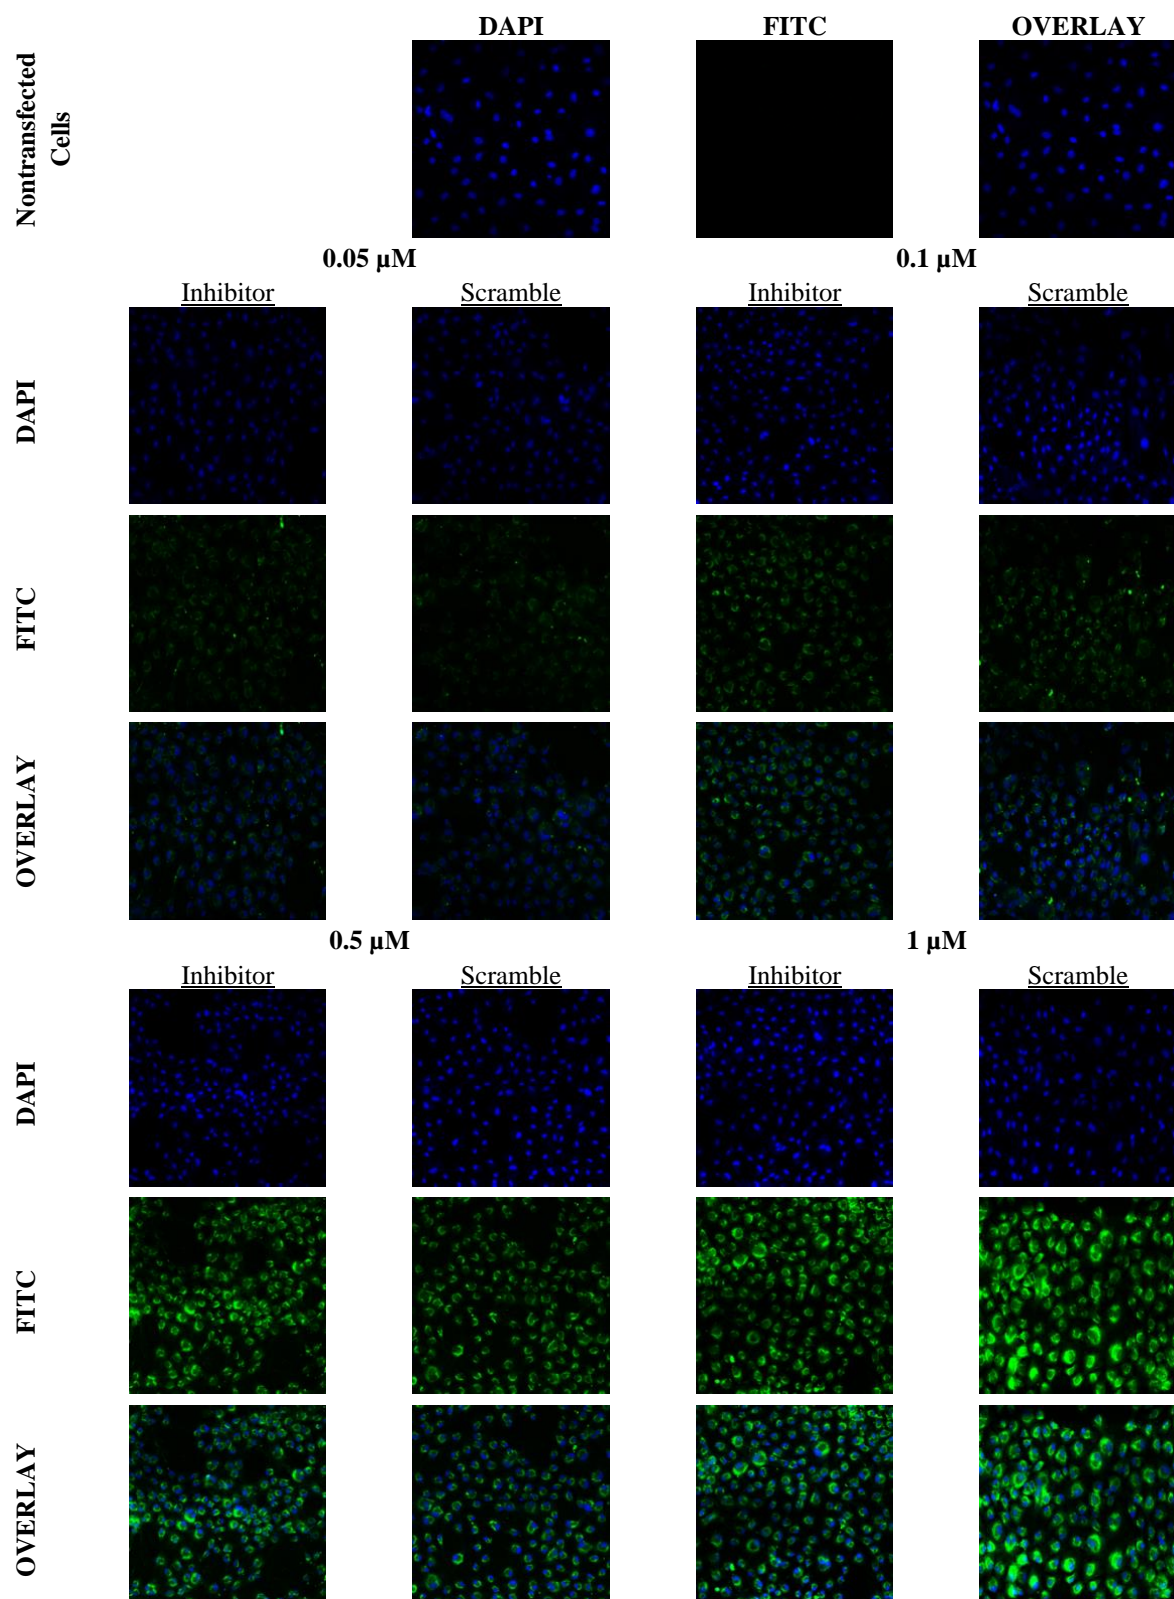

(B)

(C)

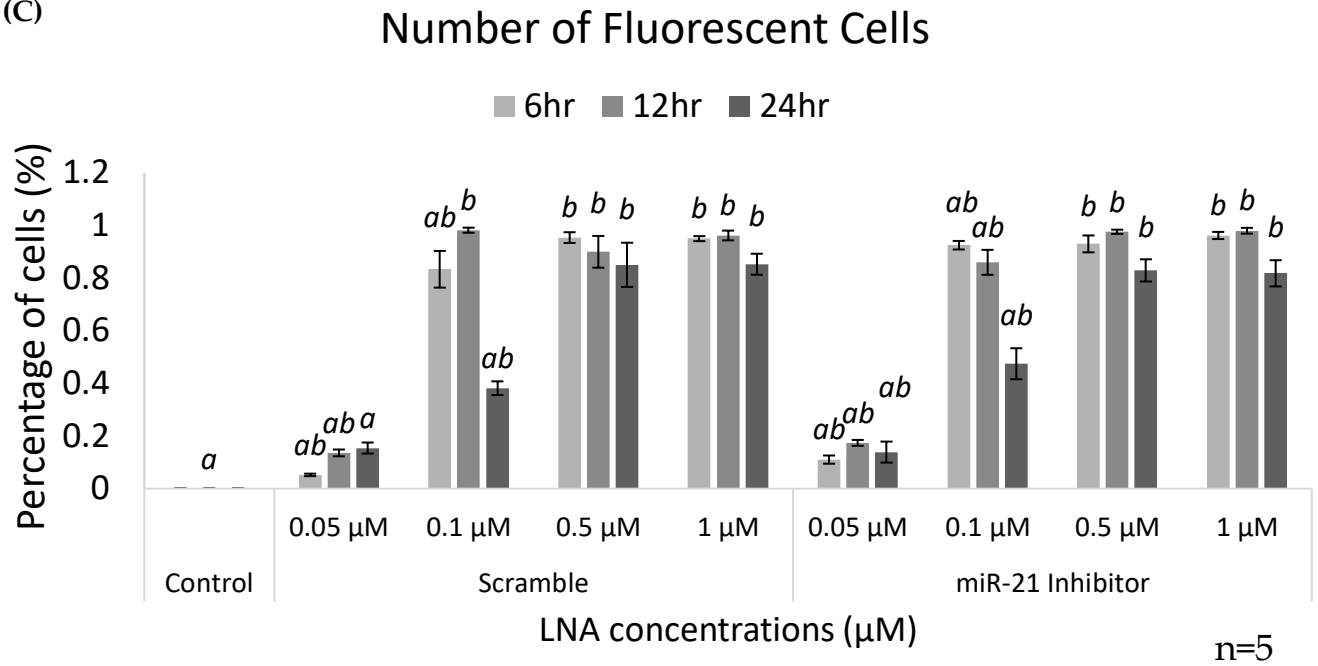

Supplementary Figure S2. Additional Confocal microscopy of LNAs at (A) 6 and (B) 24hrs with (C) number of fluorescent cells

Nontransfected Control

0.05  $\mu$ M

Inhibitor

Scramble

0.1  $\mu$ M

Inhibitor

Scramble

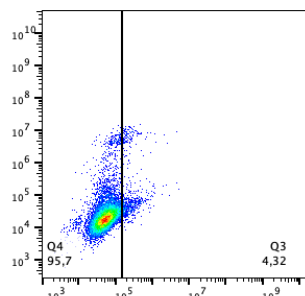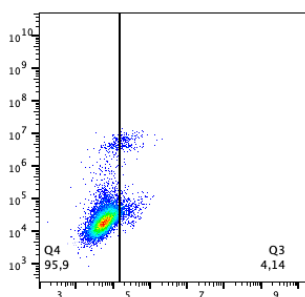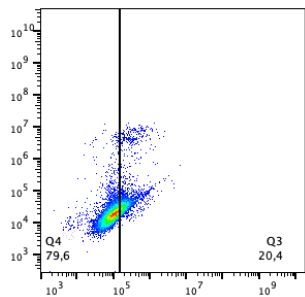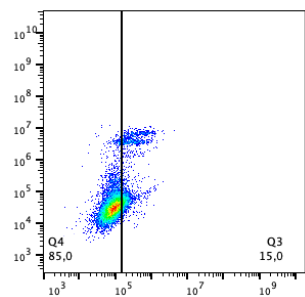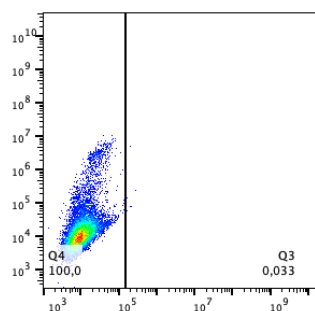

0.5  $\mu$ M

Inhibitor

Scramble

1  $\mu$ M

Inhibitor

Scramble

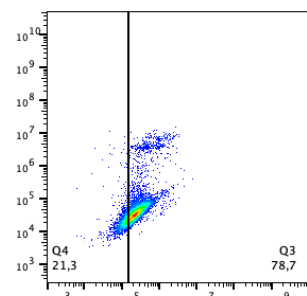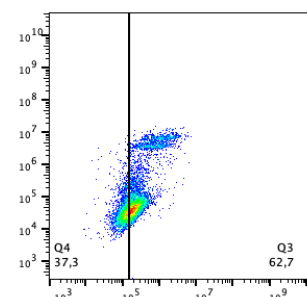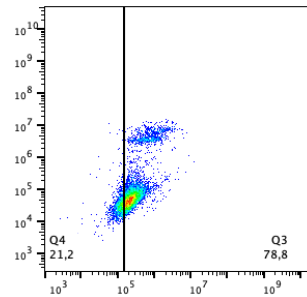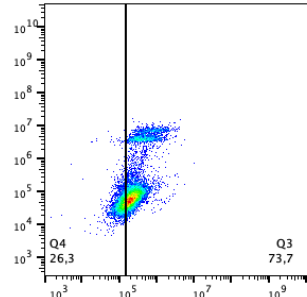

(A)

Nontransfected Control

0.05  $\mu$ M

0.1  $\mu$ M

Inhibitor

Scramble

Inhibitor

Scramble

Inhibitor

Scramble

Inhibitor

Scramble

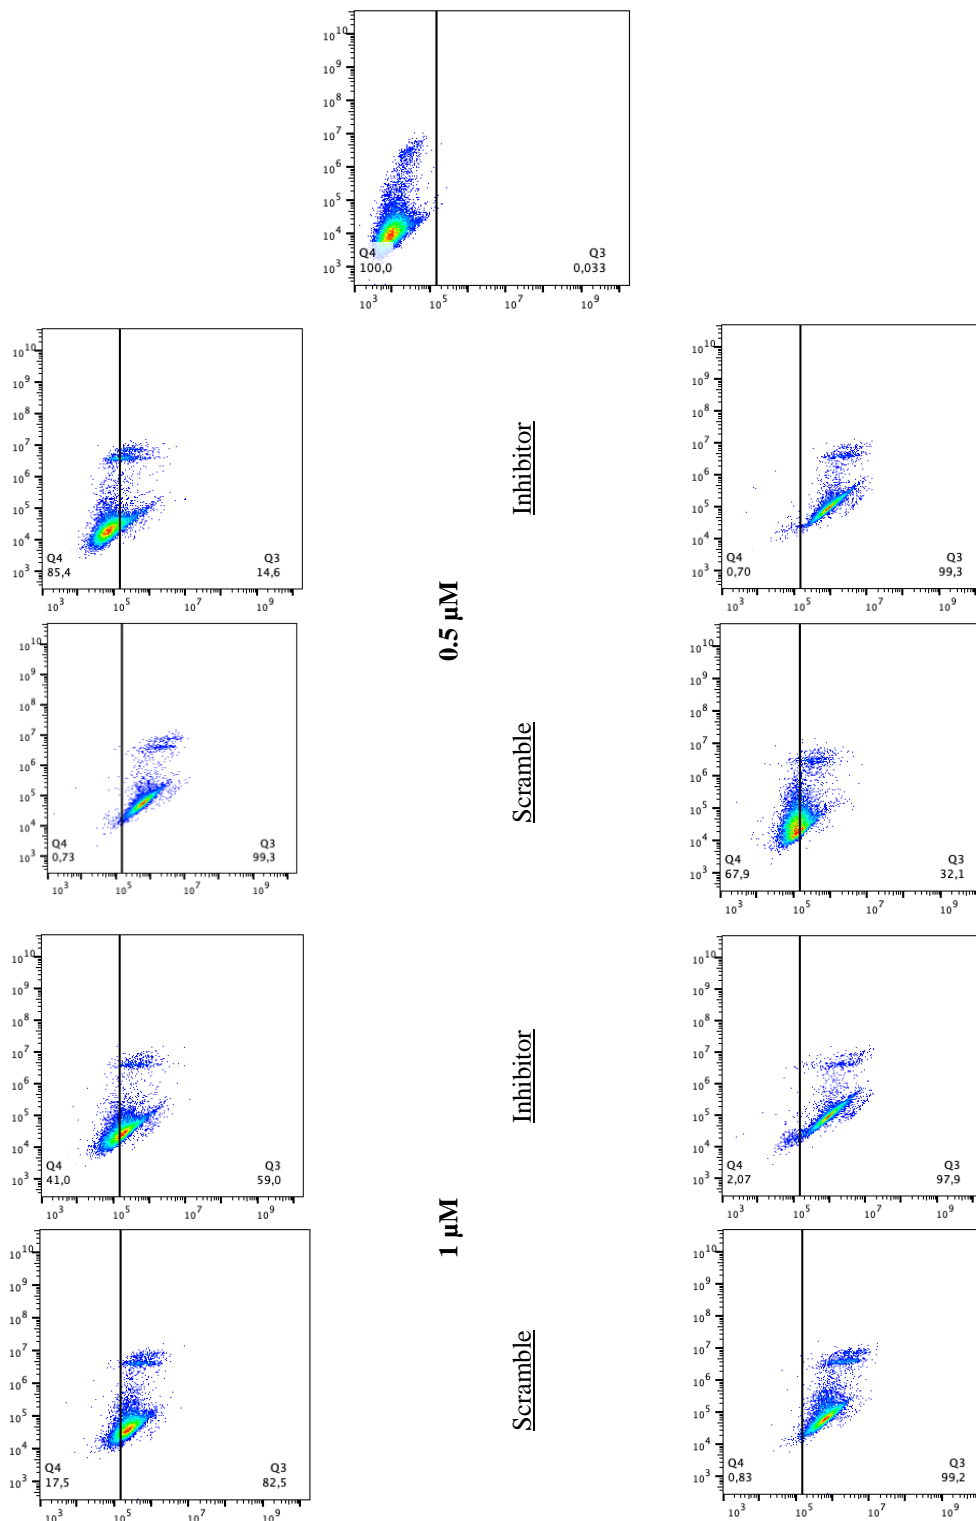

(B)

Supplementary Figure S3. Additional Flow Cytometry of LNAs at (A) 6 and (B) 24hrs.

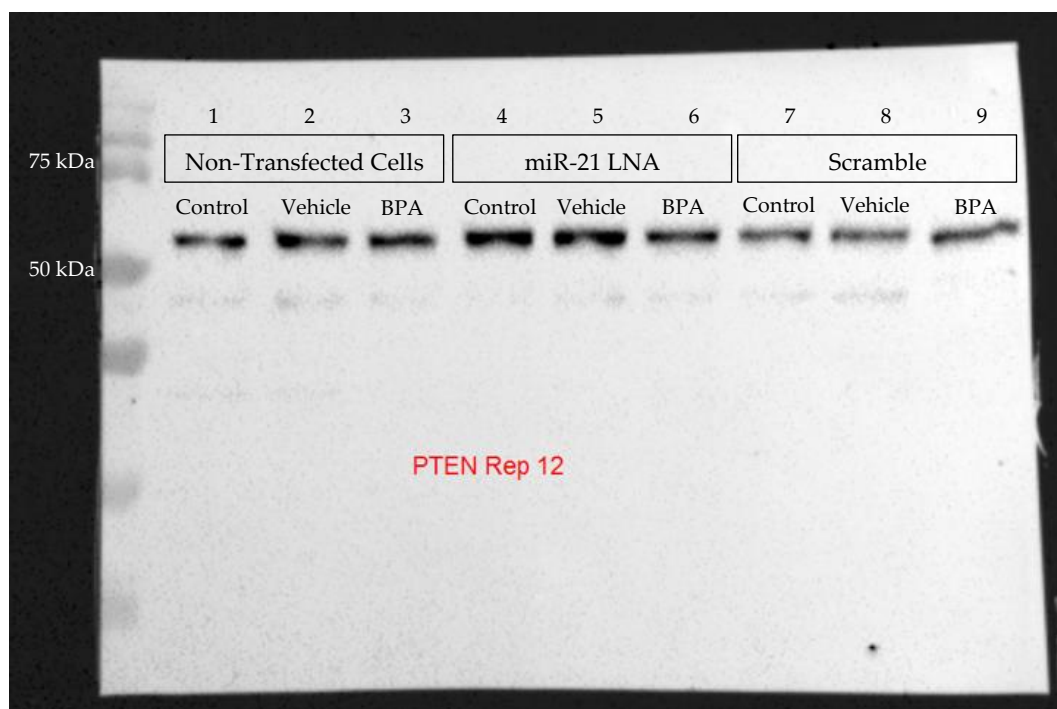

Supplementary Figure S4. Original PTEN blot after miR-21 LNA and BPA treatment.

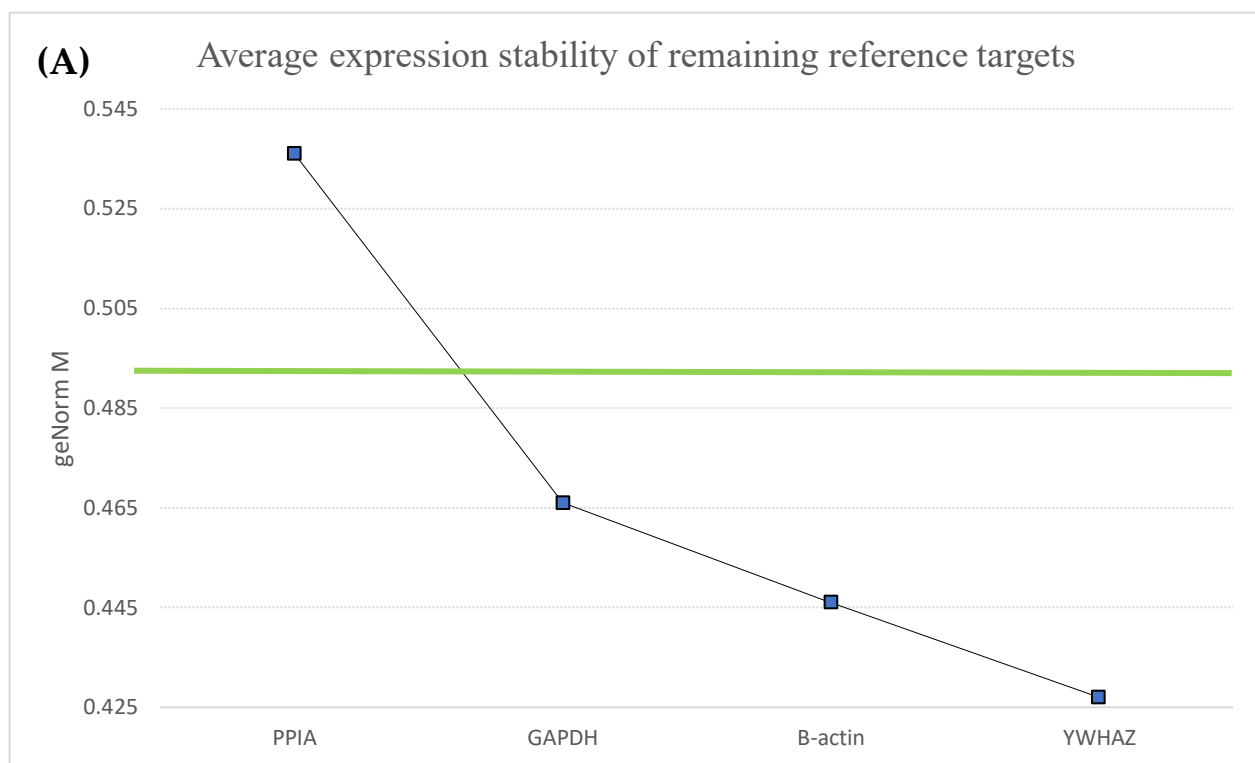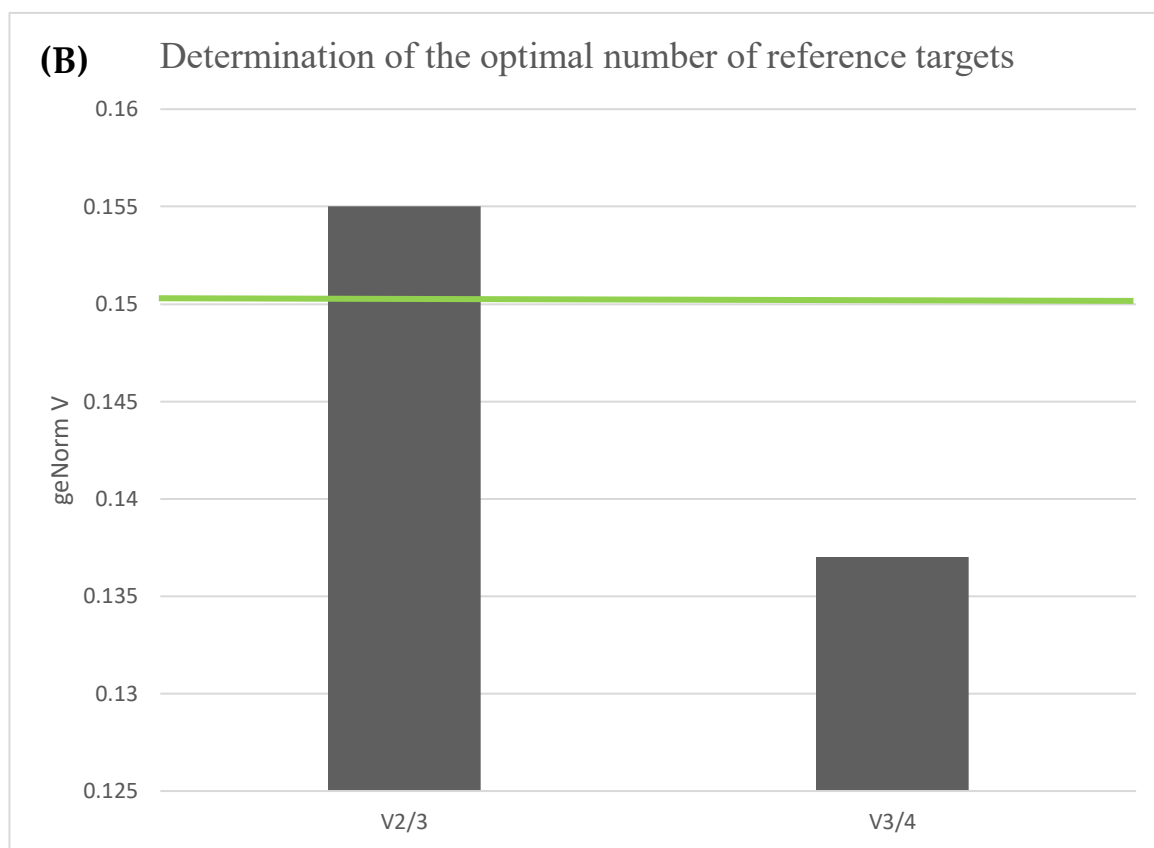

Supplementary Figure S5. Optimal reference gene selection (A) and number of references (B) across treatments using geNorm.
